# Supplementary material
Source: MDPI journal article supplement (https://www.mdpi.com/2071-1050/16/9/3848)
Supplement: s1 [file s1]

Table S1. The genera observed in both samplings (10DAA and 45DAA) with their cp values and respective trophic group (10DAA: ten days after application; 45DAA: forty-five days after application).

| <b>Genus</b>            | <b>C-p class</b> | <b>Feeding type</b>                      |
|-------------------------|------------------|------------------------------------------|
| <i>Bitylenchus</i>      | 3                | Herbivores - ectoparasites               |
| <i>Boleodorus</i>       | 2                | Herbivores - epidermal/root hair feeders |
| <i>Helicotylenchus</i>  | 3                | Herbivores - semi-endoparasites          |
| <i>Malenchus</i>        | 2                | Herbivores - epidermal/root hair feeders |
| <i>Meloidogyne</i>      | 3                | Herbivores - sedentary parasites         |
| <i>Merlinius</i>        | 3                | Herbivores - ectoparasites               |
| <i>Paratrophurus</i>    | 3                | Herbivores - ectoparasites               |
| <i>Pratylenchus</i>     | 3                | Herbivores - migratory endoparasites     |
| <i>Aphelenchoides</i>   | 2                | Fungivores                               |
| <i>Aphelenchus</i>      | 2                | Fungivores                               |
| <i>Ditylenchus</i>      | 2                | Fungivores                               |
| <i>Filenchus</i>        | 2                | Fungivores                               |
| <i>Paraphelenchus</i>   | 2                | Fungivores                               |
| <i>Acrobeles</i>        | 2                | Bacterivores                             |
| <i>Acrobeloides</i>     | 2                | Bacterivores                             |
| <i>Anaplectus</i>       | 2                | Bacterivores                             |
| <i>Cervidellus</i>      | 2                | Bacterivores                             |
| <i>Cephalobus</i>       | 2                | Bacterivores                             |
| <i>Chiloplacus</i>      | 2                | Bacterivores                             |
| <i>Chronogaster</i>     | 3                | Bacterivores                             |
| <i>Diploscapter</i>     | 1                | Bacterivores                             |
| <i>Domorganus</i>       | 3                | Bacterivores                             |
| <i>Drilocephalobus</i>  | 2                | Bacterivores                             |
| <i>Eucephalobus</i>     | 2                | Bacterivores                             |
| <i>Eumonhystera</i>     | 2                | Bacterivores                             |
| <i>Heterocephalobus</i> | 2                | Bacterivores                             |
| <i>Panagrolaimus</i>    | 1                | Bacterivores                             |
| <i>Plectus</i>          | 2                | Bacterivores                             |
| <i>Rhabditis</i>        | 1                | Bacterivores                             |
| <i>Aporcelaimellus</i>  | 5                | Omnivores                                |
| <i>Eudorylaimus</i>     | 4                | Omnivores                                |
| <i>Dorydorella</i>      | 4                | Omnivores                                |
| <i>Mesodorylaimus</i>   | 4                | Omnivores                                |
| <i>Microdorylaimus</i>  | 4                | Omnivores                                |
| <i>Prodorylaimus</i>    | 4                | Omnivores                                |
| <i>Thonus</i>           | 4                | Omnivores                                |

**Table S2.** Dissimilarity percentages between treatments and results of Similarity Percentage analysis (SIMPER) based on Bray-Curtis. Genera accounting for ~ 70% of overall dissimilarity are ranked in order of importance of their contribution. The upper right half of the table refers to the first sampling (10DAA) and the lower left half of the table refers to the second sampling (45DAA) (DAA: days after application). For every treatment n=5.

| OMW  | ctrl                 |                     | 10%                 |                     | 35%                 |                     | 70%                 |                      | 100%  |  |
|------|----------------------|---------------------|---------------------|---------------------|---------------------|---------------------|---------------------|----------------------|-------|--|
| ctrl | -                    | ctrl vs 10% = 55.68 |                     | ctrl vs 25% = 47.35 |                     | ctrl vs 75% = 49.10 |                     | ctrl vs 100% = 40.39 |       |  |
|      |                      | Aphelenchus         | 31,87               | Aphelenchus         | 24,49               | Aphelenchus         | 33,25               | Aphelenchus          | 29,91 |  |
|      |                      | Chiloplacus         | 49,6                | Acrobeloïdes        | 48,01               | Acrobeloïdes        | 54,69               | Acrobeloïdes         | 49,87 |  |
|      |                      | Acrobeloïdes        | 63,99               | Chiloplacus         | 59,87               | Chiloplacus         | 67,98               | Chiloplacus          | 58,99 |  |
|      |                      | Ditylenchus         | 74,08               | Eucephalobus        | 67,95               | Pratylenchus        | 74,28               | Pratylenchus         | 66,74 |  |
|      |                      |                     |                     | Pratylenchus        | 75,85               |                     |                     | Ditylenchus          | 72,48 |  |
| 10%  | ctrl vs 10% = 35.81  |                     | 10% vs 25% = 42.05  |                     | 10% vs 75% = 31.91  |                     | 10% vs 100% = 40.38 |                      |       |  |
|      | Aphelenchus          | 33,98               | Aphelenchus         | 22,7                | Aphelenchus         | 26,41               | Aphelenchus         | 24,28                |       |  |
|      | Ditylenchus          | 49,74               | Chiloplacus         | 43,48               | Chiloplacus         | 42,24               | Chiloplacus         | 47,19                |       |  |
|      | Acrobeloïdes         | 64,68               | Acrobeloïdes        | 58,72               | Ditylenchus         | 52,81               | Ditylenchus         | 57,74                |       |  |
|      | Chiloplacus          | 71,82               | Ditylenchus         | 66,8                | Acrobeloïdes        | 60,65               | Acrobeloïdes        | 67,55                |       |  |
|      |                      |                     | Pratylenchus        | 73,14               | Pratylenchus        | 67,23               | Bitylenchus         | 73,71                |       |  |
| 35%  | ctrl vs 25% = 46.37  |                     | 10% vs 25% = 33.01  |                     | 25% vs 75% = 40.76  |                     | 25% vs 100% = 38.67 |                      |       |  |
|      | Aphelenchus          | 48,28               | Aphelenchus         | 40,13               | Aphelenchus         | 27,5                | Acrobeloïdes        | 22,36                |       |  |
|      | Ditylenchus          | 59,89               | Acrobeloïdes        | 52,61               | Acrobeloïdes        | 46,27               | Aphelenchus         | 44,24                |       |  |
|      | Acrobeloïdes         | 69,41               | Ditylenchus         | 64,66               | Chiloplacus         | 60,94               | Chiloplacus         | 54,25                |       |  |
|      | Chiloplacus          | 75,74               | Chiloplacus         | 71,31               | Pratylenchus        | 69,49               | Pratylenchus        | 63,81                |       |  |
|      |                      |                     |                     |                     | Eucephalobus        | 76,99               | Eucephalobus        | 72,48                |       |  |
| 70%  | ctrl vs 75% = 65.40  |                     | 10% vs 75% = 53.12  |                     | 25% vs 75% = 43.87  |                     | 75% vs 100% = 37.78 |                      |       |  |
|      | Aphelenchus          | 53,8                | Aphelenchus         | 52,04               | Aphelenchus         | 45,84               | Aphelenchus         | 30,46                |       |  |
|      | Acrobeloïdes         | 63,7                | Chiloplacus         | 62,98               | Chiloplacus         | 57,95               | Chiloplacus         | 45,46                |       |  |
|      | Chiloplacus          | 73,15               | Acrobeloïdes        | 72,73               | Ditylenchus         | 68,89               | Acrobeloïdes        | 59,81                |       |  |
|      |                      |                     | Acrobeloïdes        | 79,19               |                     |                     | Pratylenchus        | 67,66                |       |  |
|      |                      |                     |                     |                     |                     |                     | Ditylenchus         | 73,18                |       |  |
| 100% | ctrl vs 100% = 62.42 |                     | 10% vs 100% = 51.03 |                     | 25% vs 100% = 42.28 |                     | 75% vs 100% = 36.49 |                      |       |  |
|      | Aphelenchus          | 59,6                | Aphelenchus         | 56,06               | Aphelenchus         | 49,03               | Aphelenchus         | 46,38                |       |  |
|      | Aphelenchoides       | 67,69               | Aphelenchoides      | 64,67               | Aphelenchoides      | 58,01               | Acrobeloïdes        | 58,41                |       |  |
|      | Ditylenchus          | 73,59               | Acrobeloïdes        | 72,8                | Acrobeloïdes        | 66,4                | Chiloplacus         | 66,22                |       |  |
|      |                      |                     |                     | Ditylenchus         | 73,84               | Ditylenchus         | 74                  |                      |       |  |
|      |                      |                     |                     |                     |                     |                     |                     |                      |       |  |
